# Supplementary material for: Bimetallic vanadium cobalt diselenide nanosheets with additional active sites for excellent asymmetric pseudocapacitive performance: comparing the electrochemical performances with M–CoSe2 (M = Zn, Mn, and Cu)
Source: Royal Society of Chemistry journal article supplement (doi:10.1039/c9ta03024g), 2019-01-01
Supplement: c9ta03024g1.pdf [file c9ta03024g1.pdf]

## Supporting information

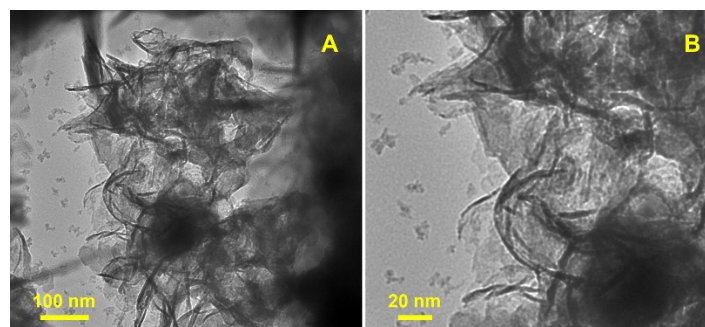

**Figure. S1.** (A, B) Different magnified TEM images of CoSe<sub>2</sub>.

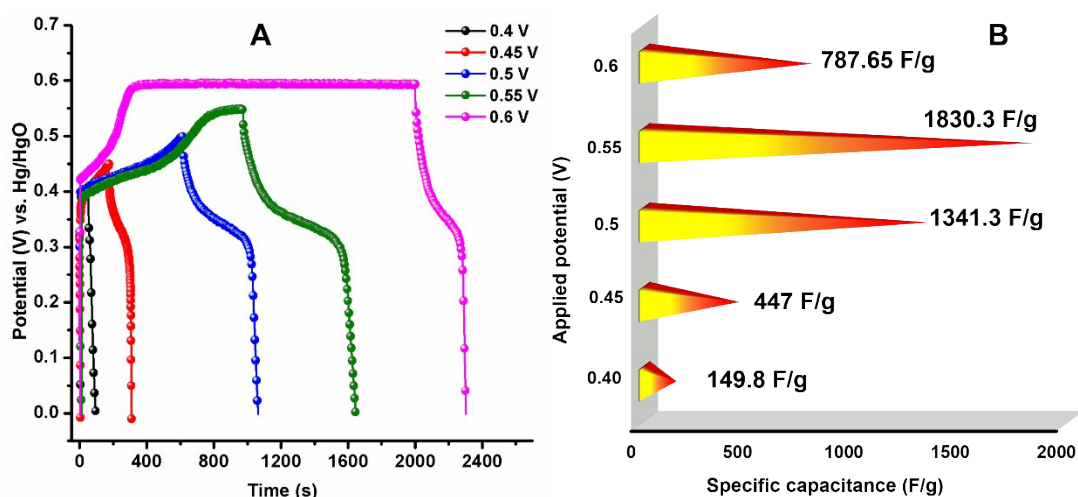

**Figure. S2.** (A) GCD curve of V-CoSe<sub>2</sub>/NF for different potential window (B) bar diagram for the specific capacitance vs. different applied potential.

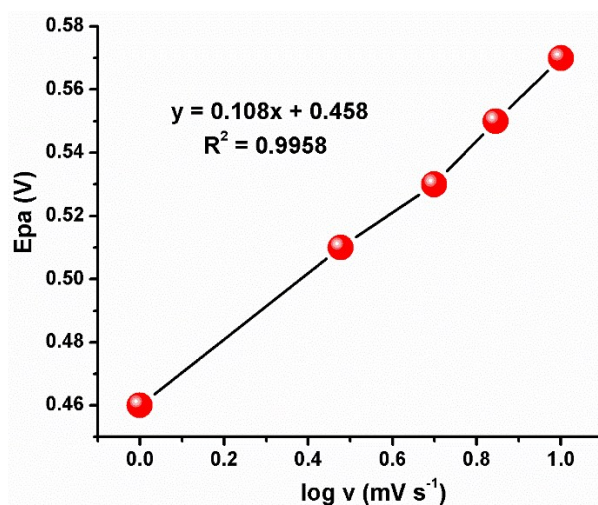

**Figure. S3.** Linear calibration plot for  $E_{pa}$  vs. logarithm of scan rate

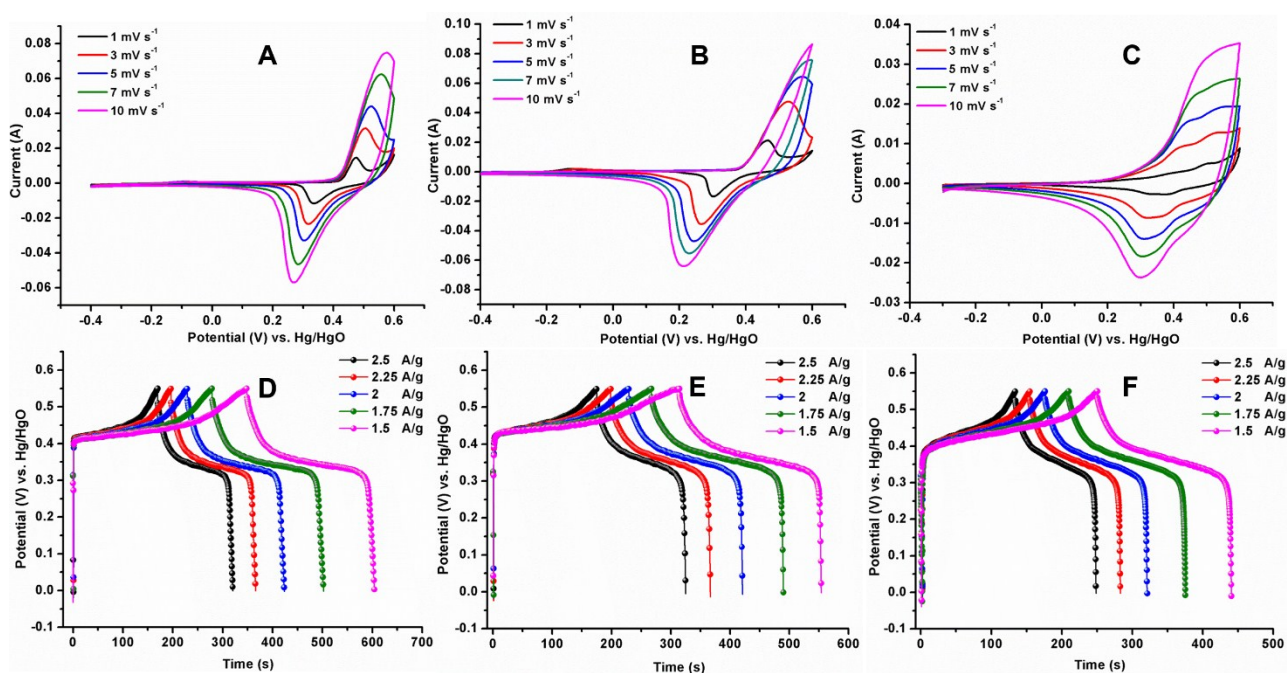

**Figure. S4.** CV curves of (A) Zn-CoSe<sub>2</sub>/NF (B) Mn-CoSe<sub>2</sub>/NF (C) Cu-CoSe<sub>2</sub>/NF for varying the scan rate and GCD curves of (D) Zn-CoSe<sub>2</sub>/NF (E) Mn-CoSe<sub>2</sub>/NF (F) Cu-CoSe<sub>2</sub>/NF for different current densities.

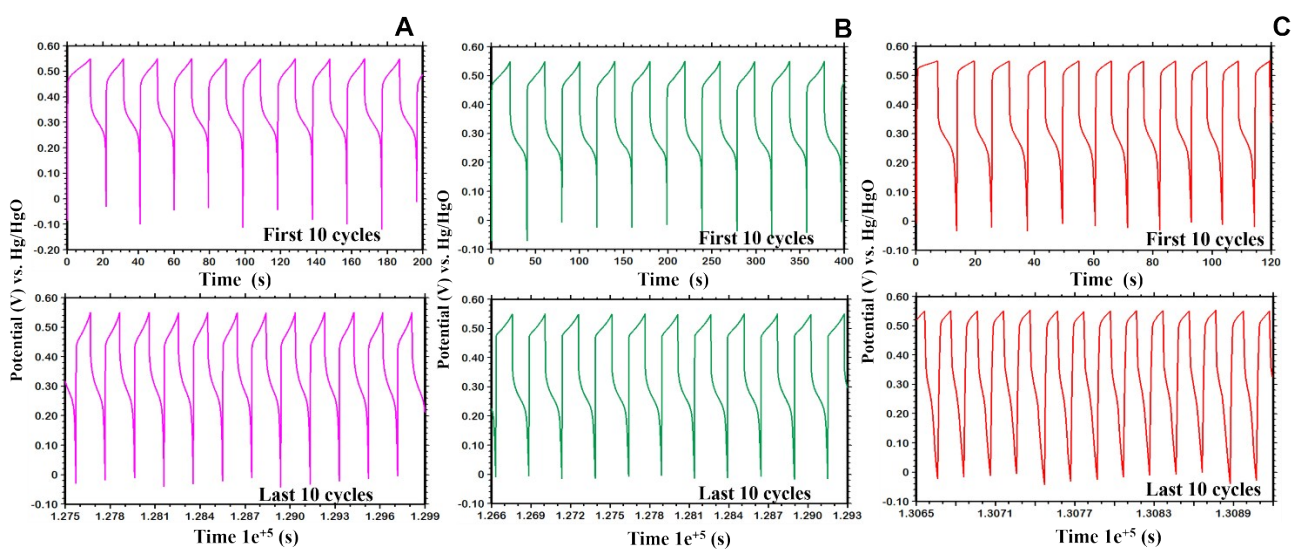

**Figure. S5.** GCD curve of (A) Zn-CoSe<sub>2</sub>/NF (B) Mn-CoSe<sub>2</sub>/NF (C) Cu-CoSe<sub>2</sub>/NF for the first/last 10 cycles from 5000 cycles.
